# Supplementary material for: Factors Associated with SARS-CoV-2 Infection in Fully Vaccinated Nursing Home Residents and Workers
Source: MDPI journal article supplement (doi:10.3390/v16020186), 2024-01-25
Supplement: s1 [file s1]

**Supplementary Table S1.** Factors associated with COVID-19 before June 2021

|                                                            | COVID-19 before June 2021 |             |       |             |             |       |
|------------------------------------------------------------|---------------------------|-------------|-------|-------------|-------------|-------|
|                                                            | Residents                 |             |       | Staff       |             |       |
|                                                            | Yes (n=206)               | No (n=59)   | P     | Yes (n=122) | No (n=164)  | P     |
| Hypertension (%)                                           | 140 (68.0)                | 39 (66.1)   | 0.79  | 20 (16.4)   | 35 (21.3)   | 0.29  |
| Diabetes mellitus (%)                                      | 46 (22.3)                 | 17 (28.8)   | 0.30  | 2 (1.6)     | 6 (3.7)     | 0.28  |
| Dyslipidemia (%)                                           | 50 (24.3)                 | 19 (32.2)   | 0.22  | 25 (20.5)   | 29 (17.7)   | 0.55  |
| COPD (%)                                                   | 23 (11.2)                 | 2 (3.4)     | 0.07  | 5 (4.1)     | 5 (3.0)     | 0.63  |
| Heart disease (%)                                          | 92 (44.9)                 | 29 (49.2)   | 0.56  | 4 (3.3)     | 6 (3.7)     | 0.86  |
| Active malignancy (%)                                      | 14 (6.8)                  | 3 (5.1)     | 0.63  | 1 (0.8)     | 1 (0.6)     | 0.83  |
| Immunodepression (%)                                       | 6 (2.9)                   | 2 (3.4)     | 0.85  | 4 (3.3)     | 5 (3.0)     | 0.91  |
| Low weight (%)                                             | 46 (22.4)                 | 19 (32.2)   | 0.12  | 2 (1.7)     | 2 (1.2)     | 0.76  |
| Obesity (%)                                                | 57 (27.8)                 | 11 (18.6)   | 0.16  | 21 (17.6)   | 18 (11.1)   | 0.12  |
| Dementia (%)                                               | 141 (68.8)                | 45 (76.3)   | 0.27  | --          | --          | --    |
| Mean [SD] no. of comorbidities                             | 2.99 [1.34]               | 3.15 [1.20] | 0.4   | --          | --          | --    |
| Mean [SD] Barthel score                                    | 40.4 [30.7]               | 32.9 [29.9] | 0.1   | --          | --          | --    |
| Mean [SD] Lobo-MMT score                                   | 13.0 [11.2]               | 11.1 [9.9]  | 0.2   | --          | --          | --    |
| IgG-S concentration in August 2020 (mean [SD] AU/ $\mu$ L) | 1.76 [3.48]               | 0.69 [1.30] | <0.01 | 0.94 [2.68] | 0.07 [0.36] | <0.01 |

**Supplementary Table S2.** Factors associated with COVID-19 before September 2021

|                                                            | COVID-19 before September 2021 |              |       |               |             |       |
|------------------------------------------------------------|--------------------------------|--------------|-------|---------------|-------------|-------|
|                                                            | Residents                      |              |       | Staff         |             |       |
|                                                            | Yes (n=206)                    | No (n=59)    | P     | Yes (n=125)   | No (n=166)  | P     |
| Hypertension (%)                                           | 140 (68.0)                     | 39 (66.1)    | 0.79  | 21 (16.8)     | 34 (21.1)   | 0.36  |
| Diabetes mellitus (%)                                      | 46 (22.3)                      | 17 (28.8)    | 0.30  | 2 (1.6)       | 6 (3.7)     | 0.28  |
| Dyslipidemia (%)                                           | 50 (24.3)                      | 19 (32.2)    | 0.22  | 25 (20.0)     | 29 (18.0)   | 0.67  |
| COPD (%)                                                   | 23 (11.2)                      | 2 (3.4)      | 0.07  | 5 (4.0)       | 5 (3.1)     | 0.68  |
| Heart disease (%)                                          | 92 (44.9)                      | 29 (49.2)    | 0.56  | 4 (3.2)       | 6 (3.7)     | 0.81  |
| Active malignancy (%)                                      | 14 (6.8)                       | 3 (5.1)      | 0.63  | 1 (0.8)       | 1 (0.6)     | 0.86  |
| Immunodepression (%)                                       | 6 (2.9)                        | 2 (3.4)      | 0.85  | 4 (3.2)       | 5 (3.1)     | 0.96  |
| Low weight (%)                                             | 46 (22.4)                      | 19 (32.2)    | 0.12  | 2 (1.6)       | 2 (1.3)     | 0.79  |
| Obesity (%)                                                | 57 (27.8)                      | 11 (18.6)    | 0.16  | 21 (17.2)     | 18 (11.3)   | 0.16  |
| Dementia (%)                                               | 141 (68.8)                     | 45 (76.3)    | 0.27  | --            | --          | --    |
| Mean [SD] no. of comorbidities                             | 2.99 [1.34]                    | 3.15 [1.20]  | 0.4   | --            | --          | --    |
| Mean [SD] Barthel score                                    | 40.4 [30.7]                    | 32.9 [29.9]  | 0.1   | --            | --          | --    |
| Mean [SD] Lobo-MMT score                                   | 13.0 [11.2]                    | 11.1 [9.9]   | 0.2   | --            | --          | --    |
| IgG-S concentration in August 2020 (mean [SD] AU/ $\mu$ L) | 1.76 [3.48]                    | 0.69 [1.30]  | <0.01 | 0.92 [2.65]   | 0.09 [0.44] | <0.01 |
| IgG-S concentration in June 2021 (mean [SD] AU/ $\mu$ L)   | 20.65 [25.22]                  | 8.83 [12.57] | <0.01 | 16.26 [22.18] | 3.27 [6.81] | <0.01 |
